# Supplementary figures and images for: A comparative study of chemical constituents and safety of Thai herbal medicated oil formula and traditional medicated oil
Source: publisher site journal article supplement (doi:10.1515/jcim-2020-0454), 2021-05-13

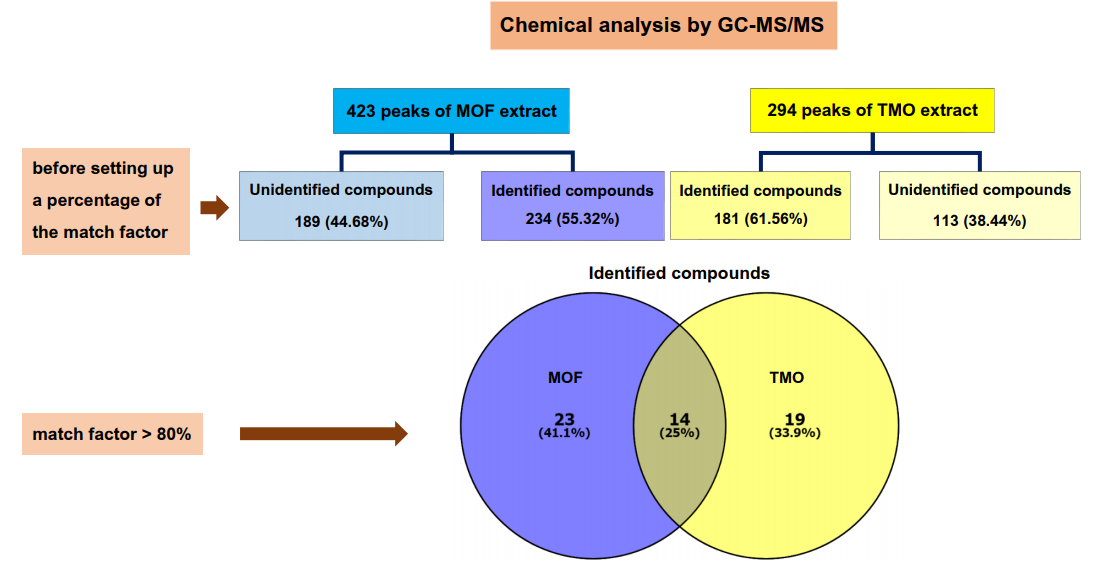
**Supplement:** The comparative constituents (numbers of compounds) between MOF and TMO extract.

Supplement: Supplementary file 1 [file j_jcim-2020-0454_suppl.docx]
